# Supplementary material for: Pyridine boronic acid-polyoxometalate based porous hybrid for efficient depletion of high abundant glycoproteins in plasma
Source: Royal Society of Chemistry journal article supplement (doi:10.1039/c8tb02265h), 2018-01-01
Supplement: c8tb02265h1.pdf [file c8tb02265h1.pdf]

# **Pyridine Boronic Acid-Polyoxometalate Based Porous Hybrid for Efficient Depletion of High Abundant Glycoproteins in Plasma**

Xue Hu, Qing Chen, Dan-Dan Zhang, Xu-Wei Chen\*, Jian-Hua Wang\*

*Research Center for Analytical Sciences, Department of Chemistry, College of Sciences, Northeastern University, Box 332, Shenyang 110819, China*

\*Corresponding author: E-mail: chenxuwei@mail.neu.edu.cn (X.-W. Chen);

jianhuajrz@mail.neu.edu.cn (J.-H Wang).

Tel: +86 83688944; Fax: +86 83676698

## **Electronic Supplementary Information**

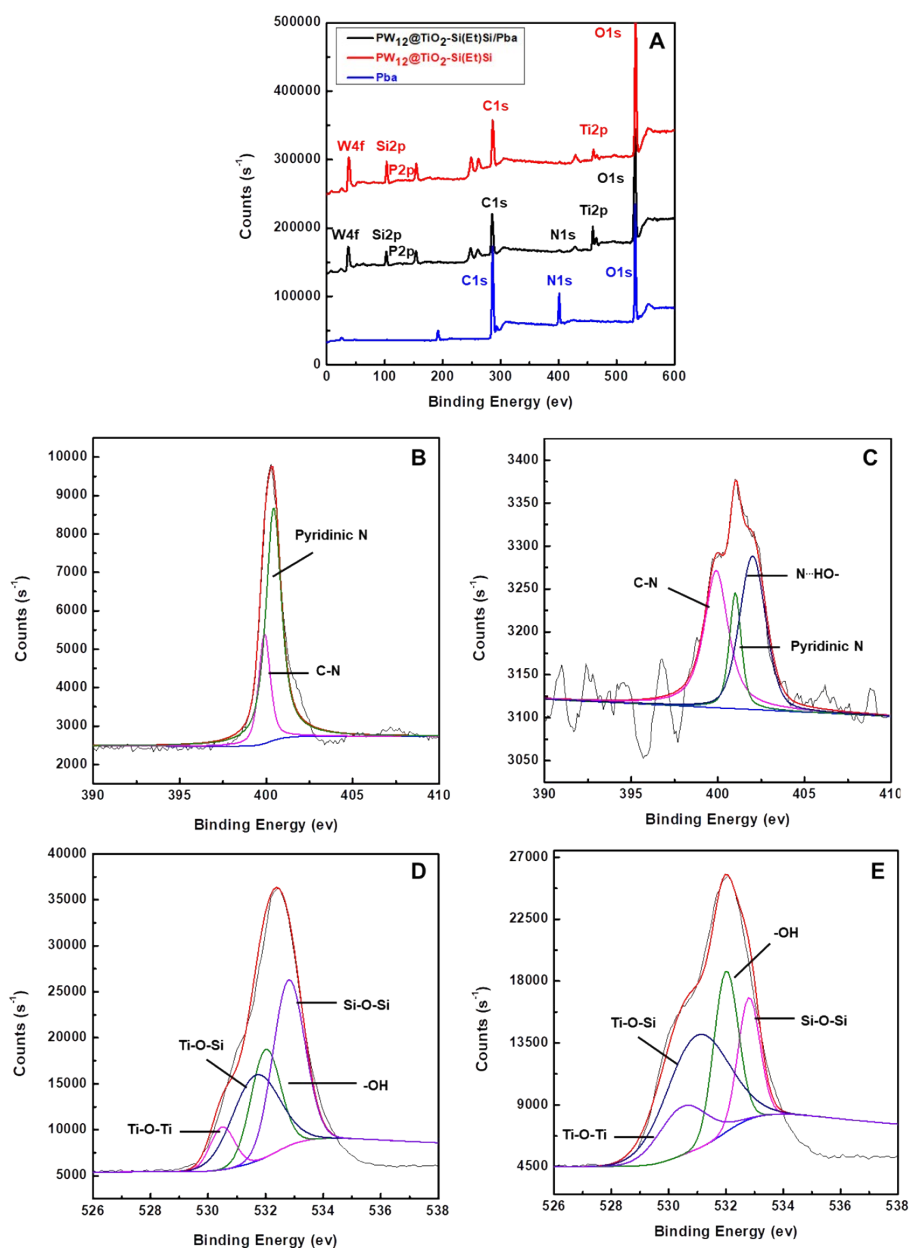

**Fig. S1** (A) Full-scan XPS spectrum of PW<sub>12</sub>@TiO<sub>2</sub>-Si(Et)Si and PW<sub>12</sub>@TiO<sub>2</sub>-Si(Et)Si/Pba hybrid; (B) N 1s XPS spectrum of pyridine boronic acid; (C) N 1s XPS spectrum of PW<sub>12</sub>@TiO<sub>2</sub>-Si(Et)Si/Pba hybrid; (D) O 1s XPS spectrum of PW<sub>12</sub>@TiO<sub>2</sub>-Si(Et)Si; (E) O 1s XPS spectrum of PW<sub>12</sub>@TiO<sub>2</sub>-Si(Et)Si/Pba hybrid.

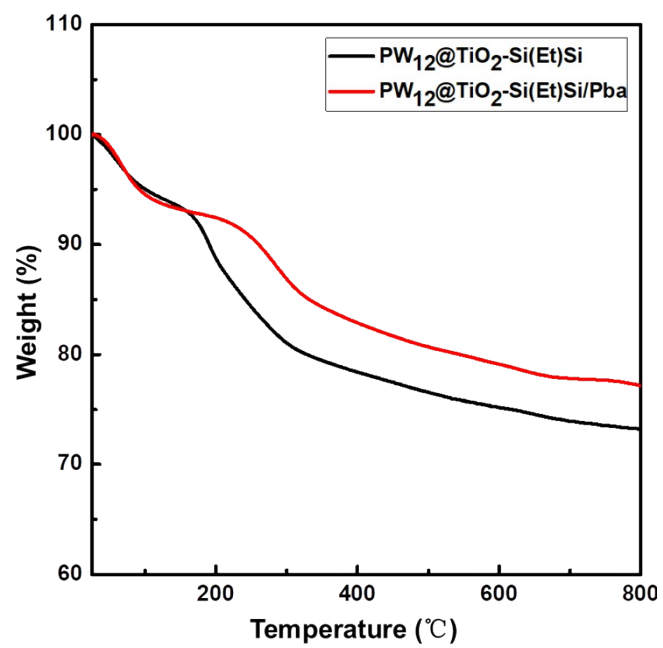

Fig. S2 The TGA curves of  $PW_{12}@TiO_2-Si(Et)Si$  and  $PW_{12}@TiO_2-Si(Et)Si/Pba$ .

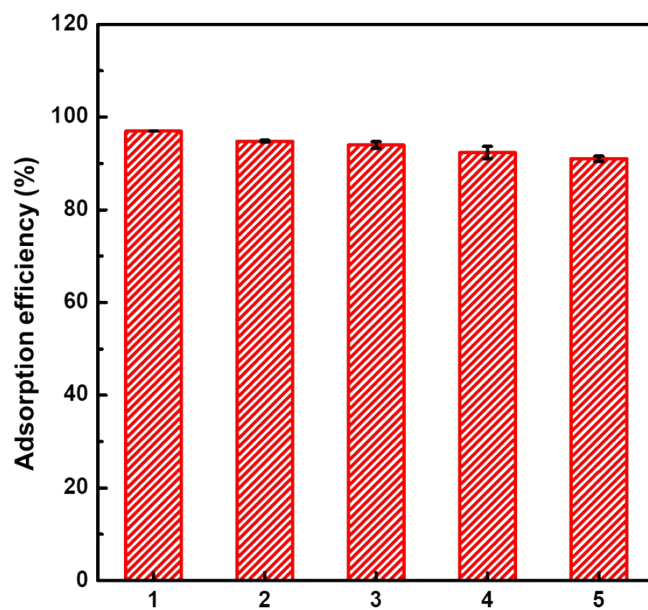

**Fig. S3** The reusability of  $PW_{12}@TiO_2-Si(Et)Si/Pba$  for glycoprotein adsorption/desorption. Protein solution:  $100\text{ mg L}^{-1}$ ,  $1.0\text{ mL}$ ,  $PW_{12}@TiO_2-Si(Et)Si/Pba$  hybrid:  $0.5\text{ mg}$ ; adsorption time:  $30\text{ min}$ ;  $NaCl$ :  $1.0\text{ mol L}^{-1}$ ;  $pH$ :  $9.0$ .

**Table S1.** Low abundance proteins in liquid supernatant after treating with PW<sub>12</sub>@TiO<sub>2</sub>-(Et)Si(Et)/Pba hybrid

| NO. | Protein Name                                         | UniProt ID | Abundance % |
|-----|------------------------------------------------------|------------|-------------|
| 1*  | Kinesin-like protein KIF18A                          | Q8NI77     | 0.00609     |
| 2   | Immunoglobulin lambda-like polypeptide 1             | Q1RMN8     | 0.0505      |
| 3*  | HUMAN T-box transcription factor TBX1                | Q152R5     | 0.00436     |
| 4*  | HUMAN cDNA, FLJ95014                                 | B2RAN2     | 0.015       |
| 5   | Ig kappa chain V-I region Roy                        | P01608     | 0.139       |
| 6   | Ig kappa chain V-I region Scw                        | P01609     | 0.0111      |
| 7   | Ig kappa chain V-III region NG9                      | P01621     | 0.47        |
| 8*  | Ig kappa chain V-III region Ti                       | P01622     | 0.0107      |
| 9   | Ig lambda chain V-II region MGC                      | P01709     | 0.0092      |
| 10* | Ig lambda chain V-II region VIL                      | P01711     | 0.0149      |
| 11* | Ig lambda chain V-VI region AR                       | P01721     | 0.00458     |
| 12* | Polymeric immunoglobulin receptor                    | P01833     | 0.00052     |
| 13  | HUMAN Ig kappa chain V-I region BAN                  | P04430     | 0.0103      |
| 14* | HUMAN Protein S100-A8                                | P05109     | 0.00266     |
| 15  | HUMAN Ig kappa chain V-III region IARC/BL41          | P06311     | 0.0011      |
| 16* | HUMAN Protein S100                                   | P06702     | 0.00573     |
| 17* | HUMAN LAMP1 protein variant                          | Q59FZ0     | 0.00152     |
| 18* | HUMAN cDNA FLJ52540                                  | B7Z2R9     | 0.00843     |
| 19  | IgLL1_HUMAN Immunoglobulin lambda-like polypeptide 1 | P15814     | 0.00152     |
| 20* | HUMAN Ig kappa chain V-III region HAH                | P18135     | 0.00386     |
| 21* | HUMAN ATP synthase subunit alpha, mitochondrial      | P25705     | 0.00102     |
| 22* | HUMAN Protein S100-A7                                | P31151     | 0.0114      |
| 23  | HUMAN Ig heavy chain V-III region GAR                | P80419     | 0.00143     |
| 24  | HUMAN Dermcidin                                      | P81605     | 0.00191     |
| 25* | HUMAN cDNA FLJ55135                                  | B4DQ98     | 0.00319     |
| 26* | HUMAN HCG1814231                                     | Q9Y628     | 0.013       |

|     |                                                       |            |          |
|-----|-------------------------------------------------------|------------|----------|
| 27* | HUMAN ADP-ribosyl cyclase/cyclic ADP-ribose hydrolase | Q10588     | 0.00462  |
| 28* | HUMAN Uncharacterized protein C19orf68                | Q86XI8     | 0.123    |
| 29* | HUMAN Testis-expressed sequence 2 protein             | J3KRY2     | 0.00138  |
| 30* | HUMAN Calcium-independent phospholipase A2-gamma      | A0A0C4DG51 | 0.00817  |
| 31* | HUMAN Deleted in malignant brain tumors 1 protein     | Q9UGM3     | 0.000881 |
| 32  | HUMAN Ig heavy chain variable region                  | A0A068LKQ4 | 0.0122   |
| 33* | HUMAN Ig heavy chain variable region                  | A0A068LKR4 | 0.00317  |
| 34* | HUMAN Ig heavy chain variable region                  | A0A068LRV5 | 0.00301  |
| 35  | Ig heavy chain variable region                        | A0A068LRW4 | 0.0963   |
| 36* | HUMAN V3-3 protein                                    | Q5NV83     | 0.013    |
| 37* | HUMAN V1-7 protein                                    | Q5NV89     | 0.0138   |
| 38* | HUMAN V2-13 protein                                   | Q5NV73     | 0.00346  |
| 39* | HUMAN V1-5 protein                                    | Q5NV65     | 0.0323   |
| 40* | HUMAN Protein IGKV2D-30                               | A0A075B6S6 | 0.00216  |
| 41* | HUMAN Protein IGKV3D-7                                | A0A0G2JMV0 | 0.00289  |
| 42* | HUMAN MS-D2 light chain variable region               | A0A0X9USL5 | 0.00198  |
| 43* | HUMAN MS-A2 light chain variable region               | A0A0X9V98  | 0.00533  |
| 44* | HUMAN MS-A1 heavy chain variable region               | A0A109PS32 | 0.00137  |
| 45* | HUMAN IGHV3-7 protein                                 | A0A0F7TD49 | 0.00172  |
| 46* | HUMAN GCT-A8 light chain variable region              | A0A109PS54 | 0.01     |
| 47* | HUMAN GCT-A2 light chain variable region              | A0A109PW41 | 0.00126  |
| 48* | HUMAN IBM-B3 light chain variable region              | A0A109PW74 | 0.00242  |
| 49* | HUMAN MS-A3 light chain variable region               | A0A120HF56 | 0.00606  |
| 50* | HUMAN MS-C3 light chain variable region               | A0A125U0U8 | 0.00175  |
| 51  | HUMAN Rheumatoid factor G9 light chain                | A0N5G3     | 0.00217  |
| 52* | HUMAN HRV Fab N27-VL                                  | A2IPI2     | 0.001    |
| 53* | HUMAN HRV Fab 026-VL                                  | A2IPI5     | 0.00278  |
| 54  | HUMAN Rheumatoid factor RF-ET7                        | A2J1M4     | 0.00210  |
| 55  | HUMAN Rheumatoid factor RF-IP24                       | A2J1N4     | 0.00558  |

|     |                                                                                        |        |          |
|-----|----------------------------------------------------------------------------------------|--------|----------|
| 56* | HUMAN Rheumatoid factor RF-ET12                                                        | A2J1N9 | 0.00310  |
| 57* | HUMAN UGa8H                                                                            | A2KUC3 | 0.00141  |
| 58  | HUMAN Vh1-D-J3-region                                                                  | A2N011 | 0.00477  |
| 59* | HUMAN VH6DJ protein                                                                    | A2N0U0 | 0.0054   |
| 60  | HUMAN VH6DJ protein                                                                    | A2N0U4 | 0.00485  |
| 61* | HUMAN VK3 protein                                                                      | A2N2F4 | 0.001    |
| 62* | HUMAN Cold agglutinin FS-2 L-chain                                                     | A2NB46 | 0.0014   |
| 63* | HUMAN VH87-2 protein                                                                   | A2N2G5 | 0.00363  |
| 64* | HUMAN Kappa light chain variable region                                                | A2NVJ5 | 0.00344  |
| 65* | HUMAN Precursor (AA -19 to 113)                                                        | A2NV55 | 0.006    |
| 66* | HUMAN Anti-folate binding protein                                                      | A2NYQ9 | 0.00883  |
| 67  | HUMAN Heavy chain Fab                                                                  | A2NYU7 | 0.0188   |
| 68  | HUMAN Heavy chain Fab                                                                  | A2NYU8 | 0.00890  |
| 69* | HUMAN Uncharacterized protein                                                          | B7ZMG8 | 0.00181  |
| 70  | HUMAN Keratin 1                                                                        | H6VRG2 | 0.00850  |
| 71* | HUMAN GRB2-related adapter protein                                                     | I3L2P9 | 0.00128  |
| 72* | HUMAN Immunglobulin heavy chain variable region                                        | Q0ZCH1 | 0.00156  |
| 73* | HUMAN Myosin-reactive immunoglo                                                        | Q9UL91 | 0.0267   |
| 74  | HUMAN CDNA FLJ26301 fis                                                                | Q6ZP85 | 0.0108   |
| 75  | HUMAN Uncharacterized protein                                                          | Q569I7 | 0.00960  |
| 76* | HUMAN Uncharacterized protein                                                          | Q6P5S3 | 0.0111   |
| 77* | HUMAN Putative uncharacterized protein DKFZp686C02218                                  | Q7Z374 | 0.00313  |
| 78  | HUMAN Uncharacterized protein                                                          | Q7Z2U7 | 0.00287  |
| 79* | HUMAN IgG L chain                                                                      | S6BAR0 | 0.0171   |
| 80* | HUMAN Uncharacterized protein                                                          | Q7Z3Y4 | 0.00556  |
| 81  | HUMAN Uncharacterized protein                                                          | Q8TCD0 | 0.000747 |
| 82  | HUMAN Putative matrix cell adhesion molecule-3                                         | Q96QS0 | 0.00361  |
| 83  | HUMAN Anti-streptococcal/anti-myosin immunoglobulin lambda light chain variable region | Q96SB0 | 0.0460   |

|    |                   |        |         |
|----|-------------------|--------|---------|
| 84 | HUMAN IgG L       | S6B294 | 0.00138 |
| 85 | HUMAN IgG H chain | S6B2A6 | 0.00986 |
